# Supplementary material for: Synthesis of a novel one-dimensional BiOBr–Bi4O5Br2 heterostructure with a high quality interface and its enhanced visible-light photocatalytic activity
Source: Royal Society of Chemistry journal article supplement (doi:10.1039/c8ce00157j), 2018-01-01
Supplement: c8ce00157j1.pdf [file c8ce00157j1.pdf]

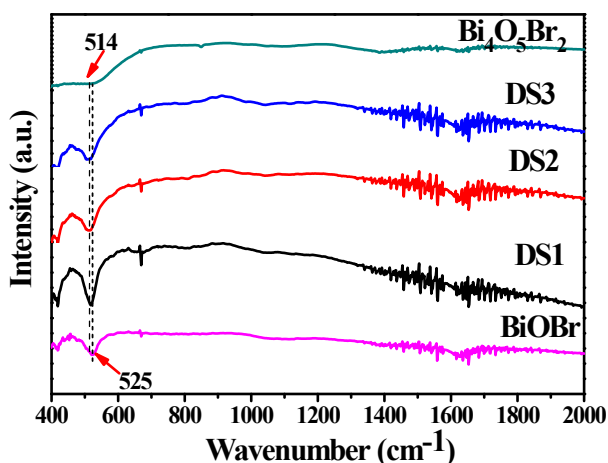

Fig. S1 FT-IR spectra of pure BiOBr, Bi<sub>4</sub>O<sub>5</sub>Br<sub>2</sub> and BiOBr-Bi<sub>4</sub>O<sub>5</sub>Br<sub>2</sub> heterostructures.

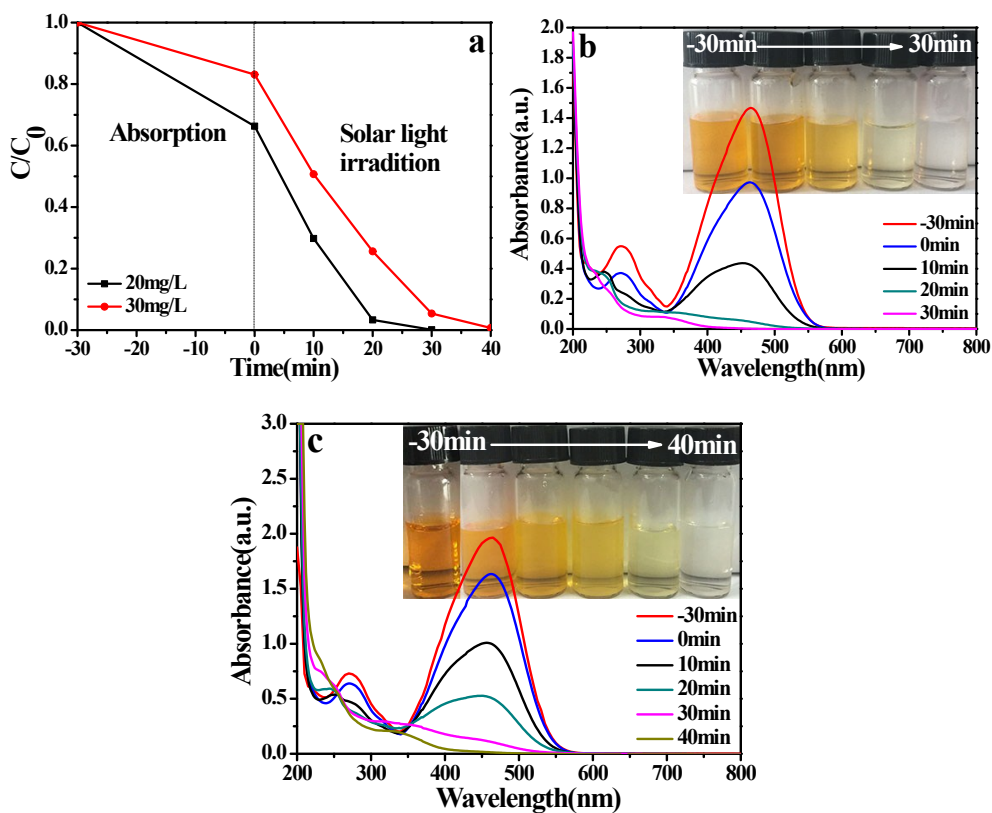

Fig. S2 (a) The degradation curve of different concentration of MO solution using DS2 as photocatalyst under solar light irradiation, (b and c) the UV-Vis absorption spectra of MO using DS2 as photocatalyst.

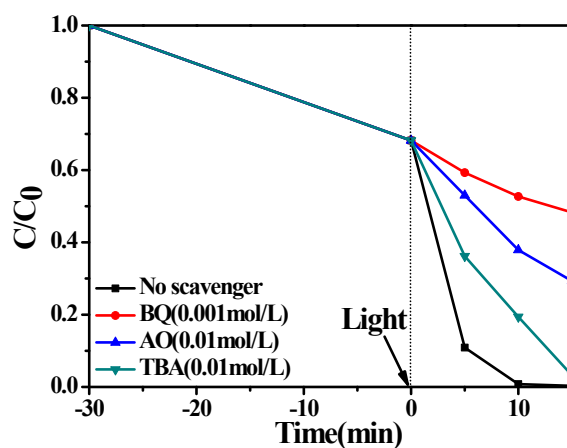

**Fig. S3** Plots of photogenerated carriers trapping for photocatalytic degradation of RhB (20mg/L) under visible light irradiation over DS2 sample.

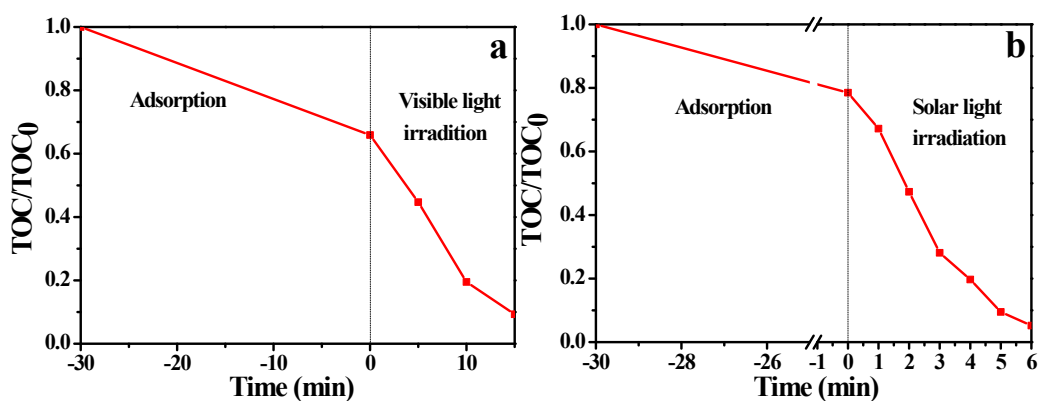

**Fig. S4** TOC removal efficiency of RhB (20mg/L) using DS2 as photocatalyst under visible (a) and solar (b) light irradiation.

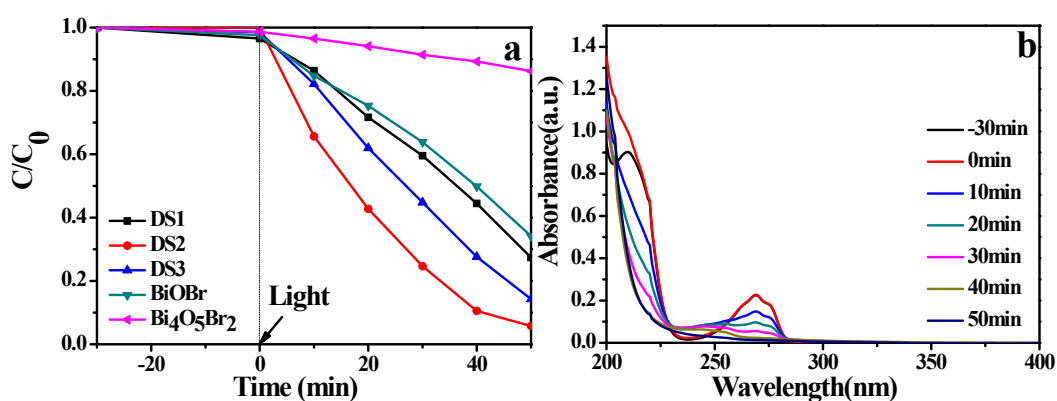

**Fig. S5** The Photocatalytic degradation curve of phenol (10mg/L) by different photocatalysts (a), and UV-Vis absorption spectra of phenol (10mg/L) (b) using DS2 as photocatalyst under solar light irradiation.
